# Supplementary material for: The Level of Remnant Cholesterol and Implications for Lipid-Lowering Strategy in Hospitalized Patients with Acute Coronary Syndrome in China: Findings from the Improving Care for Cardiovascular Disease in China—Acute Coronary Syndrome Project
Source: MDPI journal article supplement (doi:10.3390/metabo12100898), 2022-09-24
Supplement: s1 [file s1]

**The level of remnant cholesterol and implications for lipid-lowering strategy in hospitalized patients with acute coronary syndrome in China: Findings from the Improving Care for Cardiovascular Disease in China-Acute Coronary Syndrome Project**

**Supplementary Materials**

**Supplementary Table S1. Quintile cut-off value and proportion of elevated remnant cholesterol levels of acute coronary syndrome patients with different LDL-C/non-HDL-C levels**

|                             | 1st<br>quintile<br>(mmol/L) | 2nd<br>quintile<br>(mmol/L) | Median<br>(mmol/L) | 3rd<br>quintile<br>(mmol/L) | 4th<br>quintile<br>(mmol/L) | RC $\geq$ 1.0<br>mmol/L<br>(%) |
|-----------------------------|-----------------------------|-----------------------------|--------------------|-----------------------------|-----------------------------|--------------------------------|
| <b>LDL-C level (mmol/L)</b> |                             |                             |                    |                             |                             |                                |
| LDL-C<1.4                   | 0.3                         | 0.5                         | 0.6                | 0.7                         | 1.2                         | 24.4                           |
| 1.4 $\leq$ LDL-C<1.8        | 0.3                         | 0.5                         | 0.5                | 0.6                         | 0.8                         | 13.3                           |
| 1.8 $\leq$ LDL-C<2.6        | 0.3                         | 0.5                         | 0.6                | 0.7                         | 0.9                         | 16.0                           |
| LDL-C $\geq$ 2.6            | 0.4                         | 0.6                         | 0.7                | 0.8                         | 1.0                         | 21.7                           |
| <b>non-HDL-C (mmol/L)</b>   |                             |                             |                    |                             |                             |                                |
| non-HDL-C <2.6              | 0.3                         | 0.4                         | 0.4                | 0.5                         | 0.6                         | 2.9                            |
| 2.6 $\leq$ non-HDL-C<3.4    | 0.3                         | 0.5                         | 0.6                | 0.6                         | 0.8                         | 9.6                            |
| 3.4 $\leq$ non-HDL-C<4.1    | 0.4                         | 0.6                         | 0.7                | 0.8                         | 1.0                         | 21.7                           |
| non-HDL-C $\geq$ 4.1        | 0.6                         | 0.8                         | 0.9                | 1.1                         | 1.4                         | 44.3                           |

LDL-C, low-density lipoprotein cholesterol; non-HDL-C, non-high-density lipoprotein cholesterol;  
RC, remnant cholesterol.

**Supplementary Table S2. Quintile cut-off value and proportion of elevated LDL-C levels of acute coronary syndrome patients with different non-HDL-C levels**

| <b>non-HDL-C (mmol/L)</b> | <b>1st<br/>quintile<br/>(mmol/L)</b> | <b>2nd<br/>quintile<br/>(mmol/L)</b> | <b>Median<br/>(mmol/L)</b> | <b>3rd<br/>quintile<br/>(mmol/L)</b> | <b>4th<br/>quintile<br/>(mmol/L)</b> | <b>LDL-C ≥1.4<br/>mmol/L (%)</b> | <b>LDL-C ≥1.8<br/>mmol/L (%)</b> |
|---------------------------|--------------------------------------|--------------------------------------|----------------------------|--------------------------------------|--------------------------------------|----------------------------------|----------------------------------|
| non-HDL-C <2.6            | 1.4                                  | 1.6                                  | 1.7                        | 1.8                                  | 2.0                                  | 76.9                             | 41.0                             |
| 2.6 ≤ non-HDL-C <3.4      | 2.1                                  | 2.3                                  | 2.4                        | 2.5                                  | 2.7                                  | 98.5                             | 95.0                             |
| 3.4 ≤ non-HDL-C <4.1      | 2.7                                  | 2.9                                  | 3.0                        | 3.1                                  | 3.3                                  | 99.1                             | 98.1                             |
| non-HDL-C ≥4.1            | 3.3                                  | 3.6                                  | 3.8                        | 3.9                                  | 4.4                                  | 98.8                             | 98.0                             |

LDL-C, low-density lipoprotein cholesterol; non-HDL-C, non-high-density lipoprotein cholesterol.

**Supplementary Table S3. List of participating hospitals**

|    | Hospitals                                                                                 | Territories     | Provinces        | City      | Investigator             |
|----|-------------------------------------------------------------------------------------------|-----------------|------------------|-----------|--------------------------|
| 1  | Yangzhou First People's Hospital                                                          | Eastern China   | Jiangsu          | Yangzhou  | Aihua Li                 |
| 2  | Shanxi Cardiovascular Hospital                                                            | Northern China  | Shanxi           | Taiyuan   | Bao Li                   |
| 3  | Nanjing Drum Tower Hospital, The Affiliated Hospital of Nanjing University Medical School | Eastern China   | Jiangsu          | Nanjing   | Biao Xu,<br>Guangshu Han |
| 4  | Hainan General Hospital                                                                   | Southern China  | Hainan           | Haikou    | Bin Li                   |
| 5  | The Second Hospital of Jilin University                                                   | Northeast China | Jilin            | Changchun | Bin Liu                  |
| 6  | Shanghai Jingan District Shibei Hospital                                                  | Eastern China   | Shanghai         | Shanghai  | Bin Wang                 |
| 7  | Guangyuan Central Hospital                                                                | Northwest China | Sichuan          | Guangyuan | Bing Fu                  |
| 8  | The 2nd Affiliated Hosiptal of Harbin Medical University                                  | Northeast China | Heilongjia<br>ng | Harbin    | Bo Yu                    |
| 9  | Hospital 463 of Chinese People's Liberation Army                                          | Northeast China | Liaoning         | Shenyang  | Bosong Yang              |
| 10 | The Central Hospital of Mianyang                                                          | Northwest China | Sichuan          | Mianyang  | Caidong Luo              |
| 11 | The Ninth Hospital Affiliated to Shanghai Jiaotong University School of Medicine          | Eastern China   | Shanghai         | Shanghai  | Changqian Wang           |
| 12 | Zhangzhou Municipal Hospital of Fujian Province                                           | Eastern China   | Fujian           | Zhangzhou | Changyong Liu            |
| 13 | Shimen People's Hospital                                                                  | Central China   | Hunan            | Changde   | Chuanliang Liang         |
| 14 | Henan Provincial People's Hospital                                                        | Central China   | Henan            | Zhengzhou | Chuanyu Gao              |
| 15 | Shanxi Provincial People's Hospital                                                       | Northern China  | Shanxi           | Taiyuan   | Chunlin Lai              |
| 16 | Xihua County People's Hospital                                                            | Central China   | Henan            | Zhoukou   | Chuntong Wang            |
| 17 | Liaocheng People's Hospital                                                               | Eastern China   | Shandong         | Liaocheng | Chunyan Zhang            |
| 18 | Yancheng Third People's Hospital                                                          | Eastern China   | Jiangsu          | Yancheng  | Chunyang Wu              |
| 19 | Quyang Renji Hospital                                                                     | Northern China  | Hebei            | Baoding   | Congliang Zhang          |

|    |                                                                   |                 |              |           |                       |
|----|-------------------------------------------------------------------|-----------------|--------------|-----------|-----------------------|
| 20 | Xinqiao Hospital, Third Military Medical University               | Southwest China | Chongqing    | Chongqing | Cui Bin, Lan Huang    |
| 21 | The Second Xiangya Hospital of Central South University           | Central China   | Hunan        | Changsha  | Daoquan Peng          |
| 22 | The Central Hospital of Panzhihua                                 | Northwest China | Sichuan      | Panzhihua | Dawen Xu              |
| 23 | China Meitan General Hospital                                     | Northern China  | Beijing      | Beijing   | Di Wu                 |
| 24 | Xiantao First People's Hospital                                   | Central China   | Hubei        | Xiantao   | Dongmei Zhu           |
| 25 | Chest Hospital of Xinjiang Uygur Autonomous Region                | Northwest China | Xinjiang     | Urumchi   | Dongsheng Chai        |
| 26 | Beian First People's Hospital                                     | Northeast China | Heilongjiang | Heihe     | Dongyan Li            |
| 27 | The 309th Hospital of Chinese People's Liberation Army            | Northern China  | Beijing      | Beijing   | Fakuan Tang, Jun Xiao |
| 28 | Baiyin Cite Center Hospital                                       | Northwest China | Gansu        | Baiyin    | Fang Zhao             |
| 29 | Deqing People's Hospital                                          | Eastern China   | Zhejiang     | Huzhou    | Fangfang Huang        |
| 30 | Dunhua City Hospital                                              | Northeast China | Jilin        | Yanbian   | Fanju Meng            |
| 31 | Suizhou Central Hospital                                          | Central China   | Hubei        | Suizhou   | Fengwei Li            |
| 32 | Binyang People's Hospital                                         | Southern China  | Guangxi      | Nanning   | Fudong Gan            |
| 33 | The First Hospital of Qiqihaer City                               | Northeast China | Heilongjiang | Qiqihaer  | Gang Xu               |
| 34 | The Third the People's Hospital of Bengbu                         | Eastern China   | Anhui        | Bengbu    | Gengsheng Sang        |
| 35 | Zhongda Hospital, Southeast University                            | Eastern China   | Jiangsu      | Nanjing   | Genshan Ma            |
| 36 | The First Hospital of Jiamusi                                     | Northeast China | Heilongjiang | Jiamusi   | Guixia Zhang          |
| 37 | The First Affiliated Hospital of Liaoning Medical University      | Northeast China | Liaoning     | Jinzhou   | Guizhou Tao           |
| 38 | Luan County People's Hospital                                     | Northern China  | Hebei        | Tangshan  | Guo Li                |
| 39 | Guiding People's Hospital                                         | Southwest China | Guizhou      | Qinan     | Guoduo Chen           |
| 40 | Haidong Ping'an District Hospital of Traditional Chinese Medicine | Northwest China | Qinghai      | Haidong   | Guoqin Xin            |

|    |                                                                        |                    |           |          |               |
|----|------------------------------------------------------------------------|--------------------|-----------|----------|---------------|
| 41 | Xinjiang Uygur Autonomous Region<br>People's Hospital                  | Northwest<br>China | Xinjiang  | Urumchi  | Guoqing Li    |
| 42 | Sir Run Run Shaw Hospital, College of<br>Medicine, Zhejiang University | Eastern<br>China   | Zhejiang  | Hangzhou | Guosheng Fu   |
| 43 | Zhoushan People's Hospital                                             | Eastern<br>China   | Zhejiang  | Zhoushan | Guoxiong Chen |
| 44 | Dalian Municipal Central Hospital                                      | Northeast<br>China | Liaoning  | Dalian   | Hailong Lin   |
| 45 | Hebei Daming County People's<br>Hospital                               | Northern<br>China  | Hebei     | Handan   | Haiping Guo   |
| 46 | Dongguan Changping hospital                                            | Southern<br>China  | Guangdong | Dongguan | Haiyun Lin    |
| 47 | Renmin Hospital of Wuhan University                                    | Central<br>China   | Hubei     | Wuhan    | Hong Jiang    |
| 48 | Honghu People's Hospital                                               | Central<br>China   | Hubei     | Jingzhou | Hong Liu      |
| 49 | Ningxia People's Hospital                                              | Northwest<br>China | Ningxia   | Yinchuan | Hong Luan     |
| 50 | The First People's Hospital of Yunnan<br>Province (Kunhua Hospital)    | Northwest<br>China | Yunnan    | Kunming  | Hong Zhang    |
| 51 | The People's Hospital Feixian                                          | Eastern<br>China   | Shandong  | Linyi    | Honghua Deng  |
| 52 | Beijing Friendship Hospital, Capital<br>Medical University             | Northern<br>China  | Beijing   | Beijing  | Hongwei Li    |
| 53 | The First Affiliated Hospital of Bengbu<br>Medical College             | Eastern<br>China   | Anhui     | Bengbu   | Honhju Wang   |
| 54 | The Central Hospital of Zhoukou                                        | Central<br>China   | Henan     | Zhoukou  | Hualing Liu   |
| 55 | Nanpi People's Hospital                                                | Northern<br>China  | Hebei     | Cangzhou | Hui Dong      |
| 56 | Anyang District Hospital                                               | Central<br>China   | Henan     | Anyang   | Hui Liu       |
| 57 | Dalian Fourth People's Hospital                                        | Northeast<br>China | Liaoning  | Dalian   | Huifang Zhang |
| 58 | General Hospital of TISCO                                              | Northern<br>China  | Shanxi    | Taiyuan  | Huifeng Wang  |
| 59 | Ningbo First Hospital                                                  | Eastern<br>China   | Zhejiang  | Ningbo   | Huimin Chu    |
| 60 | Huining People's Hospital                                              | Northwest<br>China | Gansu     | Baiyin   | Jiabin Xi     |
| 61 | Jining City Yanzhou District People's<br>Hospital                      | Eastern<br>China   | Shandong  | Jining   | Jian Yang     |

|    |                                                            |                 |              |              |               |
|----|------------------------------------------------------------|-----------------|--------------|--------------|---------------|
| 62 | Dongguan People's Hospital                                 | Southern China  | Guangdong    | Dongguan     | Jianfeng Ye   |
| 63 | Panyu Hospital of Chinese Medicine                         | Southern China  | Guangdong    | Guangzhou    | Jianhao Li    |
| 64 | Sichuan Provincial People's Hospital                       | Northwest China | Sichuan      | Chengdu      | Jianhong Tao  |
| 65 | Mudanjiang Cardiovascular Disease Hospital                 | Northeast China | Heilongjiang | Mudanjiang   | Jianwen Liu   |
| 66 | People's Hospital of Wugang                                | Central China   | Hunan        | Shaoyang     | JiaoMei Yang  |
| 67 | Yichang Central Hospital                                   | Central China   | Hubei        | Yichang      | Jiawang Ding  |
| 68 | Zhongda Hospital, Southeast University (Jiangbei)          | Eastern China   | Jiangsu      | Nanjing      | Jiayi Tong    |
| 69 | People's Hospital of Rongchang District                    | Southwest China | Chongqing    | Chongqing    | Jie Chen      |
| 70 | Peking University First Hospital                           | Northern China  | Beijing      | Beijing      | Jie Jiang     |
| 71 | Ye County people's hospital                                | Central China   | Henan        | Pingdingshan | Jie Yang      |
| 72 | Qilu Hospital of Shandong University                       | Eastern China   | Shandong     | Jinan        | Jifu Li       |
| 73 | Affiliated Hospital of Jiangsu University                  | Eastern China   | Jiangsu      | Zhenjiang    | Jinchuan Yan  |
| 74 | Wuhan University of Science and Technology Hospital        | Central China   | Hubei        | Wuhan        | Jing Hu       |
| 75 | Shenyang City Electricity Central Hospital                 | Northeast China | Liaoning     | Shenyang     | Jing Xu       |
| 76 | Sun Yat-sen Memorial Hospital, Sun Yat-sen University      | Southern China  | Guangdong    | Guangzhou    | Jingfeng Wang |
| 77 | Yuncheng Hospital                                          | Eastern China   | Shandong     | Heze         | Jinglan Diao  |
| 78 | Fengrun District Second People's Hospital                  | Northern China  | Hebei        | Tangshan     | Jingshan Zhao |
| 79 | The First People's Hospital of Nanning City                | Southern China  | Guangxi      | Nanning      | Jinru Wei     |
| 80 | Zhangping City Hospital                                    | Eastern China   | Fujian       | Longyan      | Jinxing Yi    |
| 81 | The First Affiliated Hospital of Fujian Medical University | Eastern China   | Fujian       | Fuzhou       | Jinzi Su      |
| 82 | Chengdu Third People's Hospital                            | Northwest China | Sichuan      | Chengdu      | Jiong Tang    |

|     |                                                                                |                 |                |           |              |
|-----|--------------------------------------------------------------------------------|-----------------|----------------|-----------|--------------|
| 83  | Guangdong General Hospital                                                     | Southern China  | Guangdong      | Guangzhou | Jiyan Chen   |
| 84  | Heilongjiang Fujin City Central Hospital                                       | Northeast China | Heilongjiang   | Jiamusi   | Jiyan Yin    |
| 85  | Yantaishan hospital                                                            | Eastern China   | Shandong       | Yantai    | Juexin Fan   |
| 86  | Qingdao Municipal Hospital                                                     | Eastern China   | Shandong       | Qingdao   | Jun Guan     |
| 87  | Zhongshan Hospital Affiliated to Fudan University                              | Eastern China   | Shanghai       | Shanghai  | Junbo Ge     |
| 88  | Hospital of Xinjiang Production & Construction Corps                           | Northwest China | Xinjiang       | Urumchi   | Junming Liu  |
| 89  | Linfen People's Hospital                                                       | Northern China  | Shanxi         | Linfen    | Junping Deng |
| 90  | The First People's Hospital of Horqin District, Tongliao City                  | Northern China  | Inner Mongolia | Tongliao  | Junping Fang |
| 91  | The Military General Hospital of Beijing PLA                                   | Northern China  | Beijing        | Beijing   | Junxia Li    |
| 92  | Longyan First Hospital                                                         | Eastern China   | Fujian         | Longyan   | Kaihong Chen |
| 93  | Guiyang Sixth People's Hospital                                                | Southwest China | Guizhou        | Guiyang   | Kalan Luo    |
| 94  | Affiliated Hospital of Guangdong Medical College                               | Southern China  | Guangdong      | Guangzhou | Keng Wu      |
| 95  | Jiangxi Provincial People's Hospital                                           | Eastern China   | Jiangxi        | Nanchang  | Lang Ji      |
| 96  | The First Affiliated Hospital of Guangxi Medical University                    | Southern China  | Guangxi        | Nanning   | Lang Li      |
| 97  | Tongren Hospital Affiliated to Shanghai Jiaotong University School of Medicine | Eastern China   | Shanghai       | Shanghai  | Li Jiang     |
| 98  | Huaiyang People's Hospital                                                     | Central China   | Henan          | Zhoukou   | Li Wei       |
| 99  | Binzhou City Center Hospital                                                   | Eastern China   | Shandong       | Binzhou   | Lijun Meng   |
| 100 | Anhui Provincial Hospital                                                      | Eastern China   | Anhui          | Hefei     | Likun Ma     |
| 101 | Xiangtan City Central Hospital                                                 | Central China   | Hunan          | Xiangtan  | Lilong Tang  |
| 102 | Tangshan City Fengrun District People's Hospital                               | Northern China  | Hebei          | Tangshan  | Lin Wang     |
| 103 | The First Hospital of Haerbin City                                             | Northeast China | Heilongjiang   | Harbin    | Lin Wei      |

|     |                                                                                      |                 |           |           |                            |
|-----|--------------------------------------------------------------------------------------|-----------------|-----------|-----------|----------------------------|
| 104 | The First Affiliated Hospital of Zhengzhou University                                | Central China   | Henan     | Zhengzhou | Ling Li                    |
| 105 | Xijing Hospital                                                                      | Northwest China | Shaanxi   | Xi'an     | Ling Tao                   |
| 106 | Yiniang Hospital                                                                     | Southwest China | Yunnan    | Kunming   | Liqiong Yang               |
| 107 | The Affiliated Hospital of Guizhou Medical University                                | Southwest China | Guizhou   | Guiyang   | Lirong Wu                  |
| 108 | Central Hospital Affiliated to Shenyang Medical College                              | Northeast China | Liaoning  | Shenyang  | Man Zhang,<br>Kaiming Chen |
| 109 | Hepu People's Hospital                                                               | Southern China  | Guangxi   | Beihai    | Meisheng Lai               |
| 110 | First Affiliated Hospital of the People's Liberation Army General Hospital           | Northern China  | Beijing   | Beijing   | Miao Tian                  |
| 111 | Yanting People's Hospital                                                            | Southwest China | Sichuan   | Mianyang  | Mingcheng Bai              |
| 112 | The Second People's Hospital of Yunnan Province                                      | Southwest China | Yunnan    | Kunming   | Minghua Han                |
| 113 | Haikou People's Hospital                                                             | Southern China  | Hainan    | Haikou    | Moshui Chen                |
| 114 | Geological Mining Hospital of Hunan Province                                         | Central China   | Hunan     | Changsha  | Naiyi Liang                |
| 115 | The Eight Affiliated Hospital, Sun Yat-sen University                                | Southern China  | Guangdong | Guangzhou | Nan Jia                    |
| 116 | The Central Hospital of Xuzhou                                                       | Eastern China   | Jiangsu   | Xuzhou    | Peiying Zhang              |
| 117 | The Second hospital of Dalian Medical University                                     | Northeast China | Liaoning  | Dalian    | Peng Qu                    |
| 118 | The second people's hospital of Mengcheng                                            | Eastern China   | Anhui     | Bozhou    | Pengfei Zhang              |
| 119 | Fuqing Cite Hospital                                                                 | Eastern China   | Fujian    | Fuqing    | Ping Chen                  |
| 120 | The First Affiliated Hospital of Liaoning University of Traditional Chinese Medicine | Northeast China | Liaoning  | Shenyang  | Ping Hou                   |
| 121 | Gansu Provincial Hospital                                                            | Northwest China | Gansu     | Lanzhou   | Ping Xie                   |
| 122 | Beijing Tsinghua Changgung Hospital                                                  | Northern China  | Beijing   | Beijing   | Ping Zhang                 |
| 123 | The First Affiliated Hospital of Henan University of Science and Technology          | Central China   | Henan     | Luoyang   | Pingshuan Dong             |
| 124 | Guizhou Provincial People's Hospital                                                 | Northwest China | Guizhou   | Guiyang   | Qiang Wu                   |

|     |                                                                       |                 |                |           |                |
|-----|-----------------------------------------------------------------------|-----------------|----------------|-----------|----------------|
| 125 | The First Affiliated Hospital of Xiamen University                    | Eastern China   | Fujian         | Xiamen    | Qiang Xie      |
| 126 | Chenzhou First People's Hospital                                      | Central China   | Hunan          | Chenzhou  | Qiaoqing Zhong |
| 127 | Lujiang People's Hospital                                             | Eastern China   | Anhui          | Hefei     | Qichun Wang    |
| 128 | Yuzhou City Central Hospital                                          | Central China   | Henan          | Xuchang   | Qinfeng Su     |
| 129 | People's Hospital of Qinghai Province                                 | Northwest China | Qinghai        | Xining    | Rong Chang     |
| 130 | Quanzhou First Hospital                                               | Eastern China   | Fujian         | Quanzhou  | Rong Lin       |
| 131 | Baotou City Center Hospital                                           | Northern China  | Inner Mongolia | Baotou    | Ruiping Zhao   |
| 132 | Affiliated Hospital of Ningxia Medical University                     | Northwest China | Ningxia        | Yinchuan  | Shaobin Jia    |
| 133 | Beijing Anzhen Hospital, Capital Medical University                   | Northern China  | Beijing        | Beijing   | Shaoping Nie   |
| 134 | Wuzhou People's Hospital                                              | Southern China  | Guangxi        | Wuzhou    | Shaowu Ye      |
| 135 | North Jiangsu People's Hospital                                       | Eastern China   | Jiangsu        | Yangzhou  | Shenghu He     |
| 136 | People's Hospital of Bozhou District                                  | Southwest China | Guizhou        | Zunyi     | Shengyong Chen |
| 137 | Shanghai Sixth People's Hospital                                      | Eastern China   | Shanghai       | Shanghai  | Shixin Ma      |
| 138 | The Central Hospital of Jilin                                         | Northeast China | Jilin          | Changchun | Shuangbin Li   |
| 139 | The First Hospital of Handan                                          | Northern China  | Hebei          | Handan    | Shuanli Xin    |
| 140 | The Fourth Affiliated Hospital Zhejiang University School of Medicine | Eastern China   | Zhejiang       | Yiwu      | Shudong Xia    |
| 141 | Nenjiang People's Hospital                                            | Northeast China | Heilongjiang   | Heihe     | Shuhua Zhang   |
| 142 | Duzishan Petrochemical Hospital                                       | Northwest China | Xinjiang       | Karamay   | Shuqiu Qu      |
| 143 | Huai'an First People's Hospital                                       | Eastern China   | Jiangsu        | Huai'an   | Shuren Ma      |
| 144 | Hunan Changsha County First People's Hospital                         | Central China   | Hunan          | Changsha  | Siding Wang    |
| 145 | Li County Hospital of Traditional Chinese Medicine                    | Central China   | Hunan          | Changde   | Songbai Li     |

|     |                                                               |                 |           |           |                |
|-----|---------------------------------------------------------------|-----------------|-----------|-----------|----------------|
| 146 | The First Affiliated Hospital of Chongqing Medical University | Southwest China | Chongqing | Chongqing | Suxin Luo      |
| 147 | Nanchong Central Hospital                                     | Northwest China | Sichuan   | Nanchong  | Tao Liu        |
| 148 | Ningjin People's Hospital                                     | Eastern China   | Shandong  | Dezhou    | Tao Zhang      |
| 149 | Guang'an People's Hospital                                    | Southwest China | Sichuan   | Guang'an  | Tian Tuo       |
| 150 | Navy General Hospital                                         | Northern China  | Beijing   | Beijing   | Tianchang Li   |
| 151 | Xiangya Hospital Central South University                     | Central China   | Hunan     | Changsha  | Tianlun Yang   |
| 152 | Gongyi people's hospital                                      | Central China   | Henan     | Zhengzhou | Tianmin Du     |
| 153 | Guangzhou Red Cross Hospital                                  | Southern China  | Guangdong | Guangzhou | Tongguo Wu     |
| 154 | Dongfeng Hospital                                             | Northeast China | Jilin     | Liaoyuan  | Wei Liu        |
| 155 | Zhejiang Provincial Hospital of TCM                           | Eastern China   | Zhejiang  | Hangzhou  | Wei Mao        |
| 156 | The First People's Hospital of Longquanyi District            | Southwest China | Sichuan   | Chengdu   | Wei Tuo        |
| 157 | The First Affiliated Hospital of Guangzhou Medical College    | Southern China  | Guangdong | Guangzhou | Wei Wang       |
| 158 | The Third Xiangya Hospital of Central South University        | Central China   | Hunan     | Changsha  | Weihong Jiang  |
| 159 | The First Affiliated Hospital of Wenzhou Medical University   | Eastern China   | Zhejiang  | Wenzhou   | Wei Jian Huang |
| 160 | Affiliated Hospital of Qinghai University                     | Northwest China | Qinghai   | Xining    | Wei Jun Liu    |
| 161 | Jianshui County People's Hospital                             | Southwest China | Yunnan    | Honghe    | Wei Qing Fan   |
| 162 | The Second Affiliated Hospital of Soochow University          | Eastern China   | Jiangsu   | Suzhou    | Wei Ting Xu    |
| 163 | Teda International Cardiovascular Hospital                    | Northern China  | Tianjin   | Tianjin   | Wen Hua Lin    |
| 164 | Wuhan Asia Heart Hospital                                     | Central China   | Hubei     | Wuhan     | Xi Su          |
| 165 | Shanghai Jiading District Center Hospital                     | Eastern China   | Shanghai  | Shanghai  | Xia Chen       |
| 166 | Guangxi Hengxian County People's Hospital                     | Southern China  | Guangxi   | Nanning   | Xianan Zhang   |

|     |                                                            |                 |                |              |                |
|-----|------------------------------------------------------------|-----------------|----------------|--------------|----------------|
| 167 | The Second Hospital of Hebei Medical University            | Northern China  | Hebei          | Shijiazhuang | Xianghua Fu    |
| 168 | The First Affiliated Hospital of Soochow University        | Eastern China   | Jiangsu        | Suzhou       | Xiangjun Yang  |
| 169 | Changhai Hospital of Shanghai                              | Eastern China   | Shanghai       | Shanghai     | Xianxian Zhao  |
| 170 | Affiliated Hospital of Yan'an University                   | Northwest China | Shaanxi        | Yan'an       | Xiaochuan Ma   |
| 171 | The First People's Hospital of Jining                      | Eastern China   | Shandong       | Jining       | Xiaofei Sun    |
| 172 | Longhui County People's Hospital                           | Central China   | Hunan          | Shaoyang     | Xiaojun Wang   |
| 173 | Tonglu First People's Hospital                             | Eastern China   | Zhejiang       | Hangzhou     | Xiaolan Li     |
| 174 | Xinmi people's hospital                                    | Central China   | Henan          | Zhengzhou    | Xiaolei Li     |
| 175 | Zunhua People's Hospital                                   | Northern China  | Hebei          | Tangshan     | Xiaoli Yang    |
| 176 | West China Hospital of Sichuan University                  | Northwest China | Sichuan        | Chengdu      | Xiaoping Chen  |
| 177 | The Central Hospital of Taiyuan                            | Northern China  | Shanxi         | Taiyuan      | Xiaoping Chen  |
| 178 | Datong City Second People's Hospital                       | Northern China  | Shanxi         | Datong       | Xiaoqin Zhang  |
| 179 | The Second Affiliated Hospital to Nanchang University      | Eastern China   | Jiangxi        | Nanchang     | Xiaoshu Cheng  |
| 180 | Yuzhong County People's Hospital                           | Northwest China | Gansu          | Lanzhou      | Xiaowei Peng   |
| 181 | Qinyang People's Hospital                                  | Central China   | Henan          | Jiaozuo      | Xiaowen Ma     |
| 182 | Hebei General Hospital                                     | Northern China  | Hebei          | Shijiazhuang | Xiaoyong Qi    |
| 183 | Yutian Hospital                                            | Northern China  | Hebei          | Tangshan     | Xiaoyun Feng   |
| 184 | The Third Affiliated Hospital of Guangzhou Medical College | Southern China  | Guangdong      | Guangzhou    | Ximing Chen    |
| 185 | Chongqing Hechuan District People's Hospital               | Southwest China | Chongqing      | Chongqing    | Xin Tang       |
| 186 | The First Affiliated Hospital of Wannan Medical College    | Eastern China   | Anhui          | Wuhu         | Xingsheng Tang |
| 187 | Inner Mongolia People's Hospital                           | Northern China  | Inner Mongolia | Hohhot       | Xingsheng Zhao |

|     |                                                            |                 |              |           |               |
|-----|------------------------------------------------------------|-----------------|--------------|-----------|---------------|
| 188 | Ledong Second People's Hospital                            | Southern China  | Hainan       | Ledong    | Xiufeng Chen  |
| 189 | Wuxi Xishan People's Hospital                              | Eastern China   | Jiangsu      | Wuxi      | Xudong Li     |
| 190 | Tangdu Hospital of The Fourth Military Medical University  | Northwest China | Shaanxi      | Xi'an     | Xue Li        |
| 191 | Shanghai East Hospital Affiliated to Tongji University     | Eastern China   | Shanghai     | Shanghai  | Xuebo Liu     |
| 192 | Beijing Fangshan District First Hospital                   | Northern China  | Beijing      | Beijing   | Xuemei Peng   |
| 193 | The General Hospital of Shenyang Military Region           | Northeast China | Liaoning     | Shenyang  | Yaling Han    |
| 194 | Xiamen Cardiovascular Disease Hospital                     | Eastern China   | Fujian       | Xiamen    | Yan Wang      |
| 195 | Tieli People's Hospital                                    | Northeast China | Heilongjiang | Yichun    | Yanbo Niu     |
| 196 | Dianjiang People's Hospital                                | Southwest China | Chongqing    | Chongqing | Yang Yu       |
| 197 | The First Hospital of Jilin University                     | Northeast China | Jilin        | Changchun | Yang Zheng    |
| 198 | The Second Affiliated Hospital of Qiqihar Medical Hospital | Northeast China | Heilongjiang | Qiqihar   | Yanli Wang    |
| 199 | General Hospital of Guangzhou Military Command             | Southern China  | Guangdong    | Guangzhou | Yanlie Zheng  |
| 200 | Fujian Provincial Hospital                                 | Eastern China   | Fujian       | Fuzhou    | Yansong Guo   |
| 201 | The First Affiliated hospital of Dalian Medical University | Northeast China | Liaoning     | Dalian    | Yanzong Yang  |
| 202 | The First People's Hospital of Changde                     | Central China   | Hunan        | Changde   | Yi Huang      |
| 203 | Tianjin Chest Hospital                                     | Northern China  | Tianjin      | Tianjin   | Yin Liu       |
| 204 | Hunan Provincial People's Hospital                         | Central China   | Hunan        | Changsha  | Ying Guo      |
| 205 | Longmen People's Hospital                                  | Southern China  | Guangdong    | Huizhou   | Yingchao Luo  |
| 206 | People's Hospital of Yuxi City                             | Southwest China | Yunnan       | Yuxi      | Yinglu Hao    |
| 207 | The First Affiliated Hospital of China Medical University  | Northeast China | Liaoning     | Shenyang  | Yingxian Sun  |
| 208 | The People's Hospital of Guangxi Zhuang Autonomous Region  | Southern China  | Guangxi      | Nanning   | Yingzhong Lin |

|     |                                                            |                 |                |            |               |
|-----|------------------------------------------------------------|-----------------|----------------|------------|---------------|
| 209 | The First Teaching Hospital of Xinjiang Medical University | Northwest China | Xinjiang       | Urumchi    | Yitong Ma     |
| 210 | Dazhou Central Hospital                                    | Northwest China | Sichuan        | Dazhou     | Yong Guo      |
| 211 | Mingguang People's Hospital                                | Eastern China   | Anhui          | Chuzhou    | Yong Li       |
| 212 | Baogang Hospital                                           | Northern China  | Inner Mongolia | Baotou     | Yongdong Li   |
| 213 | Jiangsu Binhai County People's Hospital                    | Eastern China   | jiangsu        | Yancheng   | Yonglin Zhang |
| 214 | The Fourth Affiliated Hospital of China Medical University | Northeast China | Liaoning       | Shenyang   | Yuanzhe Jin   |
| 215 | First Affiliated Hospital of Harbin Medical University.    | Northeast China | Heilongjiang   | Harbin     | Yue Li        |
| 216 | Sihui People's Hospital                                    | Southern China  | Guangdong      | Zhaoqing   | Yuehua Huang  |
| 217 | Tianjin Medical University General Hospital                | Northern China  | Tianjin        | Tianjin    | Yuemin Sun    |
| 218 | Qian'an People's Hospital                                  | Northern China  | Hebei          | Tangshan   | Yuheng Yang   |
| 219 | Zhalantun People's Hospital                                | Northern China  | Inner Mongolia | Hulunbeier | Yuhua Zhu     |
| 220 | Longjiang First People's Hospital                          | Northeast China | Heilongjiang   | Qiqihar    | Yuhuan Shi    |
| 221 | The Second Affiliated Hospital of Zhengzhou University     | Central China   | Henan          | Zhengzhou  | Yulan Zhao    |
| 222 | Nanfang Hospital of Southern Medical University            | Southern China  | Guangdong      | Guangzhou  | Yuqing Hou    |
| 223 | The First Affiliated Hospital to Nanchang University       | Eastern China   | Jiangxi        | Nanchang   | Zeqi Zheng    |
| 224 | Cangzhou Central Hospital                                  | Northern China  | Hebei          | Cangzhou   | Zesheng Xu    |
| 225 | The Central Hospital of Shaoyang                           | Central China   | Hunan          | Shaoyang   | Zewei Ouyang  |
| 226 | Yulong Hospital                                            | Southwest China | Yunnan         | Lijiang    | Zeyuan He     |
| 227 | Affiliated Hospital of North Sichuan Medical College       | Northwest China | Sichuan        | Nanchong   | Zhan Lv       |
| 228 | The People's Hospital of Liaoning Province                 | Northeast China | Liaoning       | Shenyang   | Zhanquan Li   |
| 229 | The First Affiliated Hospital of Jiamusi University        | Northeast China | Heilongjiang   | Jiamusi    | Zhaofa He     |

|     |                                                            |                 |           |              |                |
|-----|------------------------------------------------------------|-----------------|-----------|--------------|----------------|
| 230 | Tangshan Gongren Hospital                                  | Northern China  | Hebei     | Tangshan     | Zheng Ji       |
| 231 | The First Affiliated Hospital of Lanzhou University        | Northwest China | Gansu     | Lanzhou      | Zheng Zhang    |
| 232 | The Third Hospital of Shijiazhuang                         | Northern China  | Hebei     | Shijiazhuang | Zhenguo Ji     |
| 233 | Huaibei Miners General Hospital                            | Eastern China   | Anhui     | Huaibei      | Zhenqi Su      |
| 234 | Wuxi People's Hospital                                     | Eastern China   | Jiangsu   | Wuxi         | Zhenyu Yang    |
| 235 | Linyi People's Hospital                                    | Eastern China   | Shandong  | Linyi        | Zhihong Ou     |
| 236 | Jiangsu Province Hospital                                  | Eastern China   | Jiangsu   | Nanjing      | Zhijian Yang   |
| 237 | The Second Hospital of Shanxi Medical University           | Northern China  | Shanxi    | Taiyuan      | Zhiming Yang   |
| 238 | The Affiliated Hospital of Xuzhou Medical College          | Eastern China   | Jiangsu   | Xuzhou       | Zhirong Wang   |
| 239 | Southwest Hospital, Third Military Medical University      | Southwest China | Chongqing | Chongqing    | Zhiyuan Song   |
| 240 | Zhijin People's Hospital                                   | Southwest China | Guizhou   | Bijie        | Zhongshan Wang |
| 241 | The First Affiliated Hospital of Xi'an Jiaotong University | Northwest China | Shaanxi   | Xi'an        | Zuyi Yuan      |

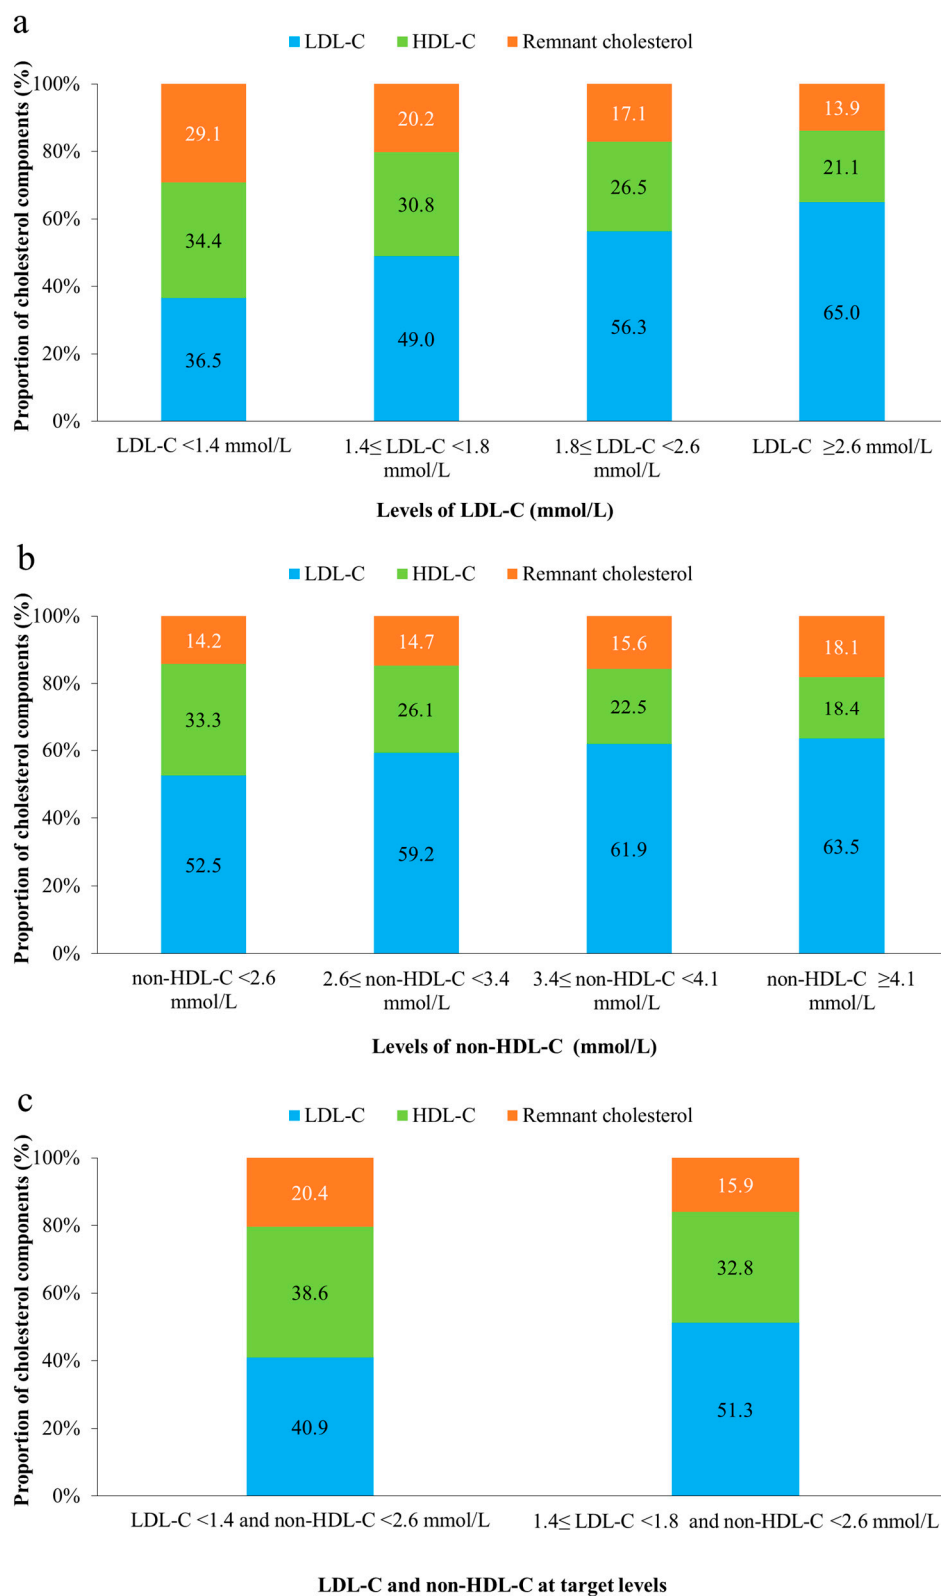

**Supplementary Figure S1.(a) Proportion of different cholesterol components in total cholesterol among patients with different LDL-C levels; (b) Proportion of different cholesterol components in total cholesterol among patients with different non-HDL-C levels; (c) Proportion of different cholesterol components in total cholesterol among patients with LDL-C and non-HDL-C at target levels.**

LDL-C, low-density lipoprotein cholesterol; non-HDL-C, non-high-density lipoprotein cholesterol.
